# Supplementary material for: Assembly of 1D, 2D and 3D lanthanum(iii) coordination polymers with perchlorinated benzenedicarboxylates: positional isomeric effect, structural transformation and ring-opening polymerisation of glycolide
Source: Royal Society of Chemistry journal article supplement (doi:10.1039/c5dt04687d), 2016-01-01
Supplement: c5dt04687d1.pdf [file c5dt04687d1.pdf]

## Electronic Supplementary Information

### **Assembly of 1D, 2D and 3D lanthanum(III) coordination polymers with perchlorinated benzenedicarboxylates: positional isomeric effect, structural transformation and ring-opening polymerisation of glycolide**

**Sheng-Chun Chen,<sup>a,b</sup> An-Qi Dai,<sup>b</sup> Kun-Lin Huang,<sup>\*c</sup> Zhi-Hui Zhang,<sup>b</sup> Ai-Jun Cui,<sup>b</sup> Ming-Yang He,<sup>\*b</sup> and Qun Chen,<sup>\*a,b</sup>**

<sup>a</sup> *School of Chemical Engineering, Nanjing University of Science and Technology, Nanjing 20094, P. R. China. E-mail: chenqunjpu@yahoo.com.*

<sup>a</sup> *School of Petrochemical Engineering, Key Laboratory of Fine Petro-chemical Technology, Changzhou University, Changzhou 213164, P. R. China. E-mail: hemingyangjpu@yahoo.com.*

<sup>b</sup> *College of Chemistry, Chongqing Normal University, Chongqing 401331, P. R. China*

## **Contents**

|                                                                                                     |    |
|-----------------------------------------------------------------------------------------------------|----|
| (1) Various coordination modes for isomeric tcbdc ligands in <b>1–8 (Scheme S1)</b> .....           | 3  |
| (2) The 3D supramolecular architecture of <b>1 (Fig. S1)</b> .....                                  | 3  |
| (3) The 2D supramolecular network of <b>2 (Fig. S2)</b> .....                                       | 4  |
| (4) The 3D supramolecular network of <b>2 (Fig. S3)</b> .....                                       | 4  |
| (5) The 2D supramolecular network of <b>3 (Fig. S4)</b> .....                                       | 5  |
| (6) The intermolecular weak O–H···Cl and Cl···Cl interactions in <b>4 (Fig. S5)</b> .....           | 5  |
| (7) The intermolecular weak O–H···Cl, C–H···Cl and Cl···Cl interactions in <b>5 (Fig. S6)</b> ..... | 6  |
| (8) The intermolecular weak C–H···Cl and Cl···Cl interactions in <b>6 (Fig. S7)</b> .....           | 6  |
| (9) The intermolecular weak C–H···Cl and Cl···Cl interactions in <b>7 (Fig. S8)</b> .....           | 7  |
| (10) The intermolecular weak Cl···Cl interactions in <b>8 (Fig. S9)</b> .....                       | 7  |
| (11) A schematic representation of 1D shape of channel for <b>4–8 (Fig. S10)</b><br>.....           | 8  |
| (12) Simulated and experimental X-ray powder diffraction patterns for <b>1–8 (Fig. S11)</b> .....   | 9  |
| (13) TGA curves of complexes <b>1–8 (Fig. S12)</b> .....                                            | 10 |

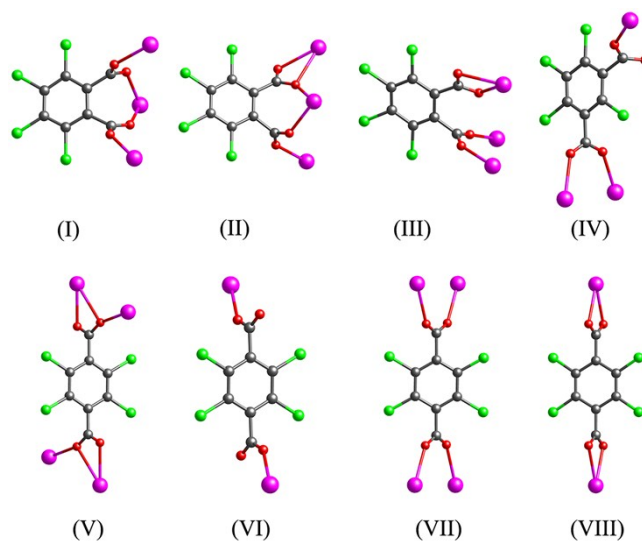

**Scheme S1** Various coordination modes for isomeric tcbdc ligands in **1–8**.

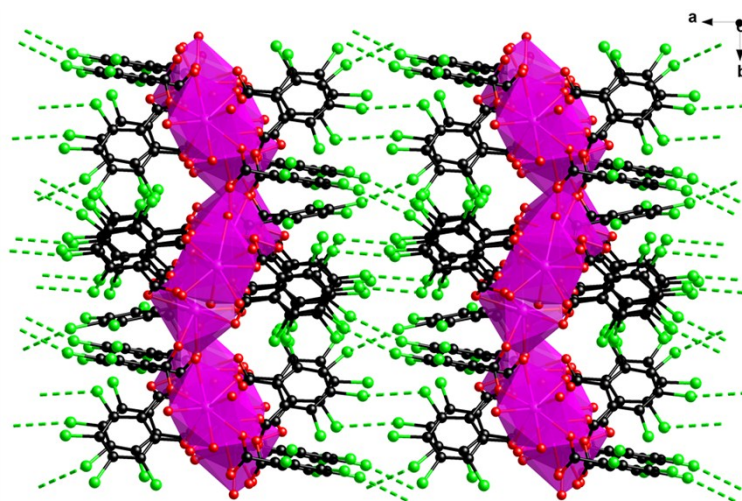

**Fig. S1** The 3D supramolecular architecture of **1** (Cl $\cdots$ Cl interactions are shown as bright green dashed lines; irrelevant hydrogen atoms are omitted for clarity).

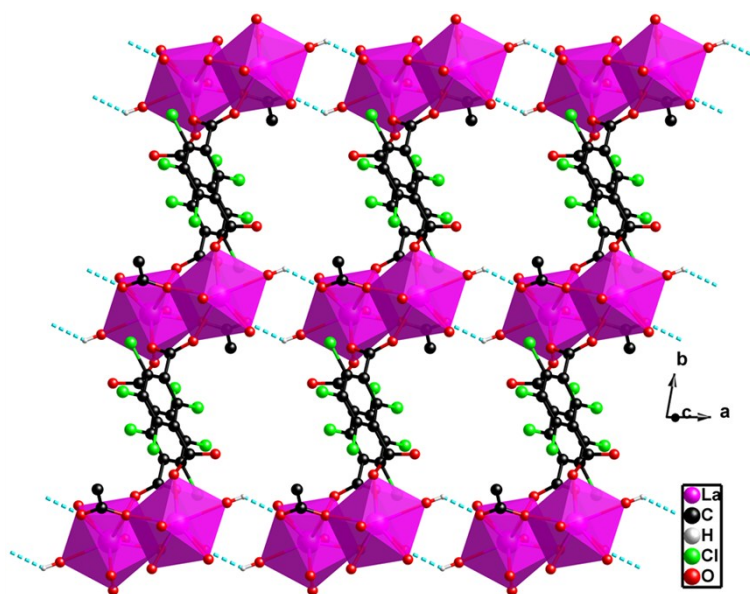

**Fig. S2** The 2D supramolecular network of **2** with hydrogen-bonding interactions highlighted in the bright turquoise dashed lines (irrelevant hydrogen atoms are omitted for clarity).

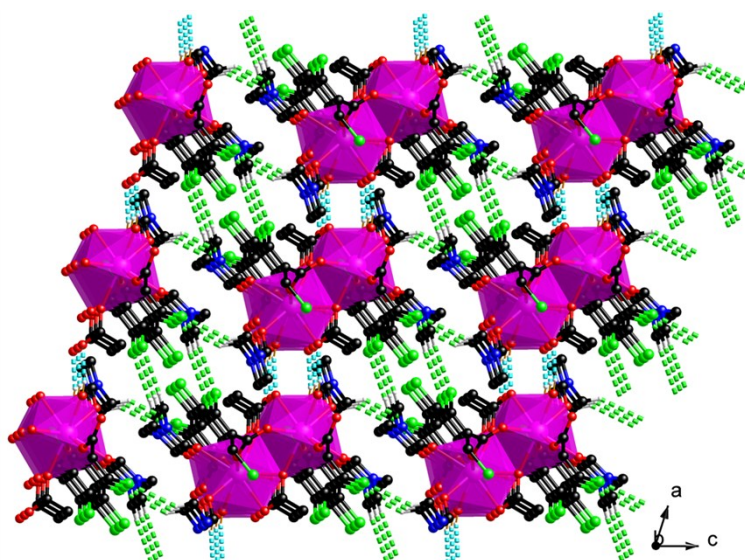

**Fig. S3** The 3D supramolecular network of **2** with hydrogen-bonding interactions highlighted in dashed lines (irrelevant hydrogen atoms are omitted for clarity).

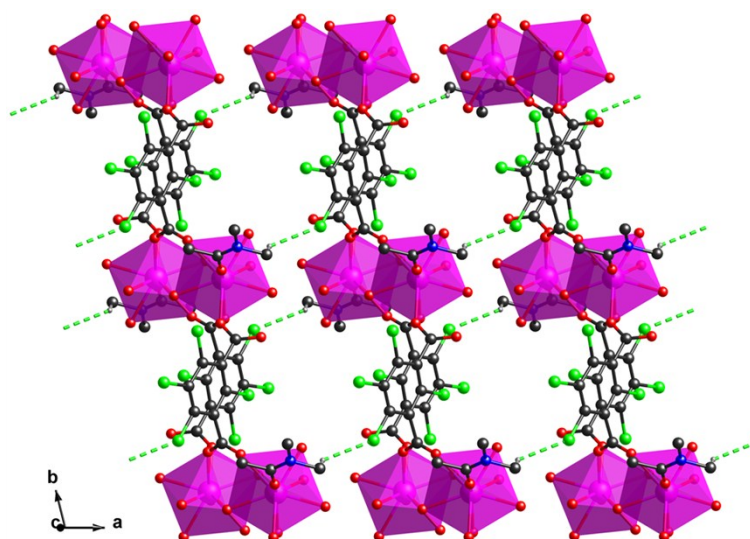

**Fig. S4** The 2D supramolecular network of **3** with C–H···Cl hydrogen-bonding interactions highlighted in green dashed lines (irrelevant hydrogen atoms are omitted for clarity)

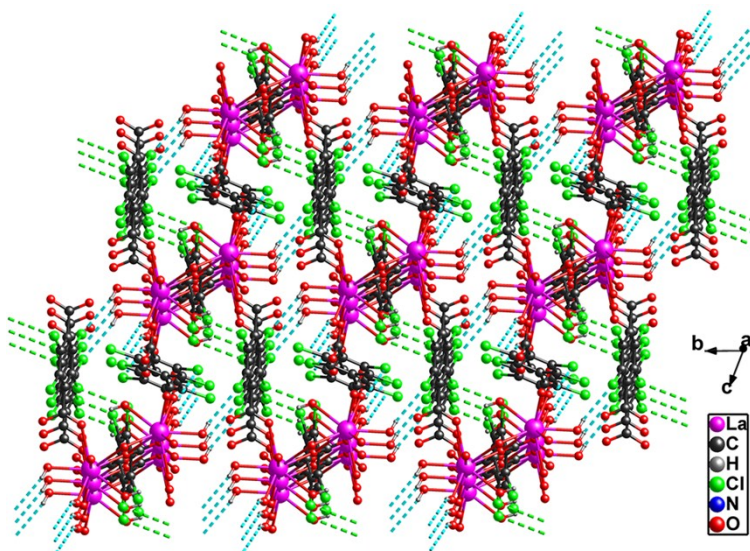

**Fig. S5** The intermolecular weak O–H···Cl (turquoise dashed lines) and Cl···Cl (green dashed lines) interactions in **4** (irrelevant hydrogen atoms are omitted for clarity).

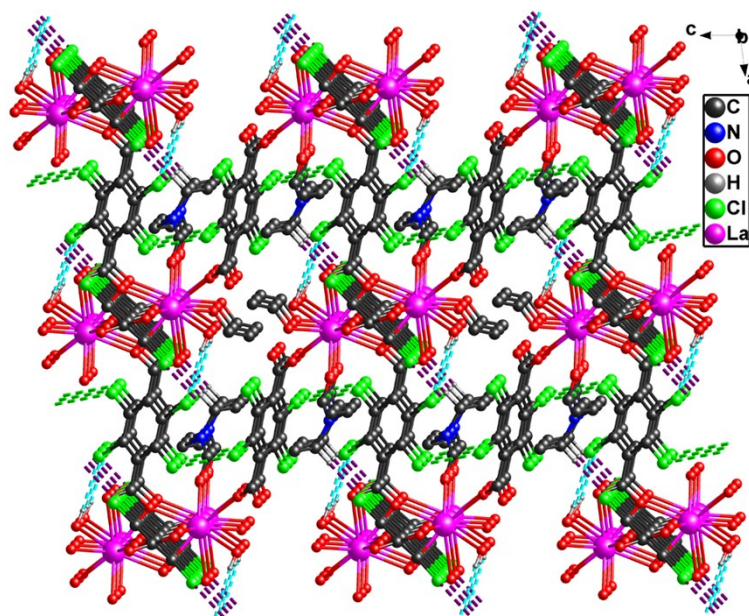

**Fig. S6** The intermolecular weak O–H $\cdots$ Cl (turquoise dashed lines), C–H $\cdots$ Cl (violet dashed lines) and Cl $\cdots$ Cl (green dashed lines) interactions in **5** (irrelevant hydrogen atoms are omitted for clarity).

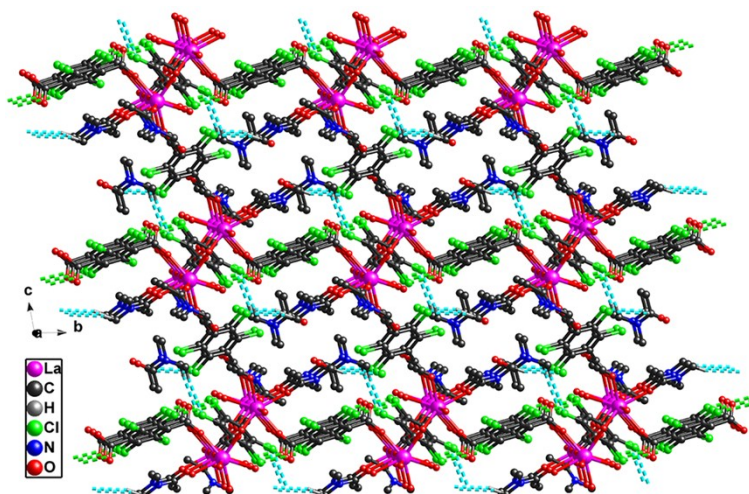

**Fig. S7** The intermolecular weak C–H $\cdots$ Cl (turquoise dashed lines) and Cl $\cdots$ Cl (green dashed lines) interactions in **6** (irrelevant hydrogen atoms are omitted for clarity).

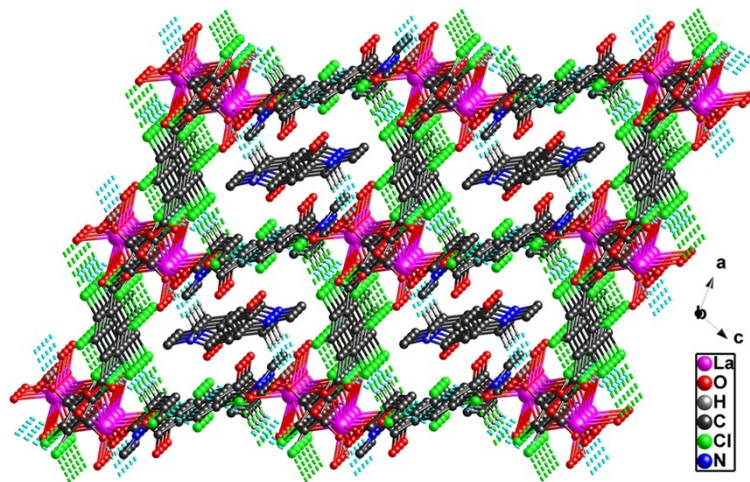

**Fig. S8** The intermolecular weak C-H...O (turquoise dashed lines) and Cl...Cl (green dashed lines) interactions in **7** (irrelevant hydrogen atoms are omitted for clarity).

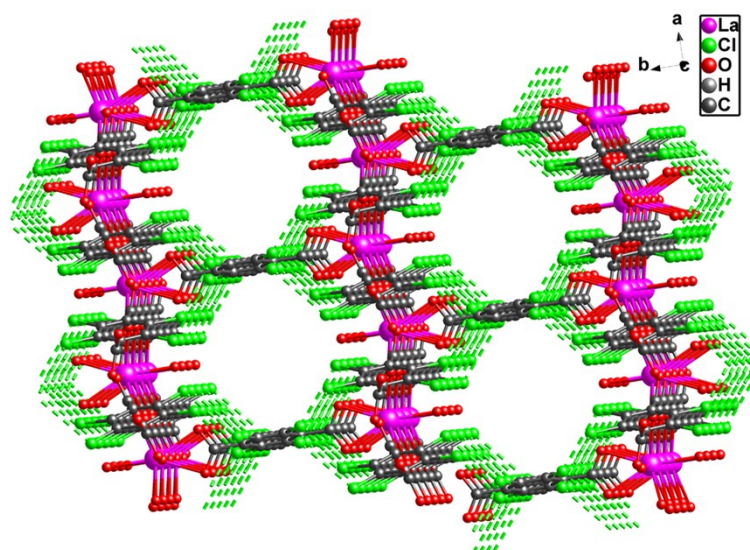

**Fig. S9** The intermolecular weak Cl...Cl interactions (green dashed lines) in **8** (irrelevant hydrogen atoms are omitted for clarity).

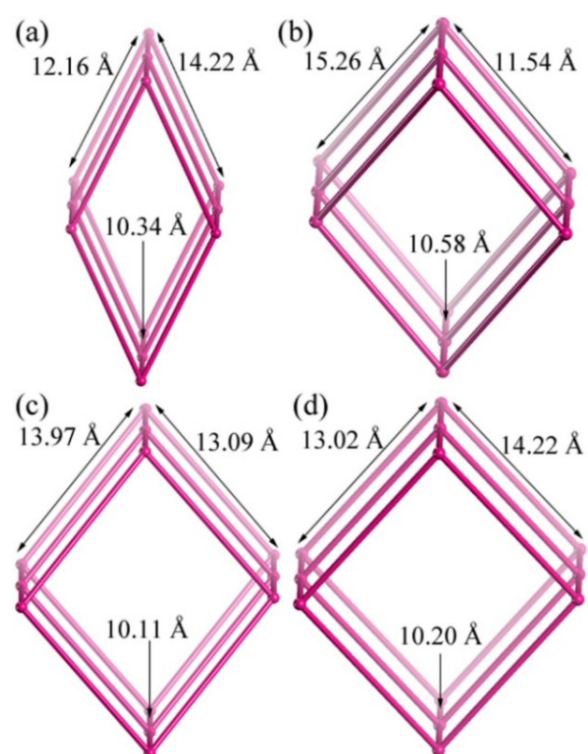

**Fig. S10** A schematic representation of 1D shape of channel for **4** (a), **5** (b), **6** (c) and **7** (d).

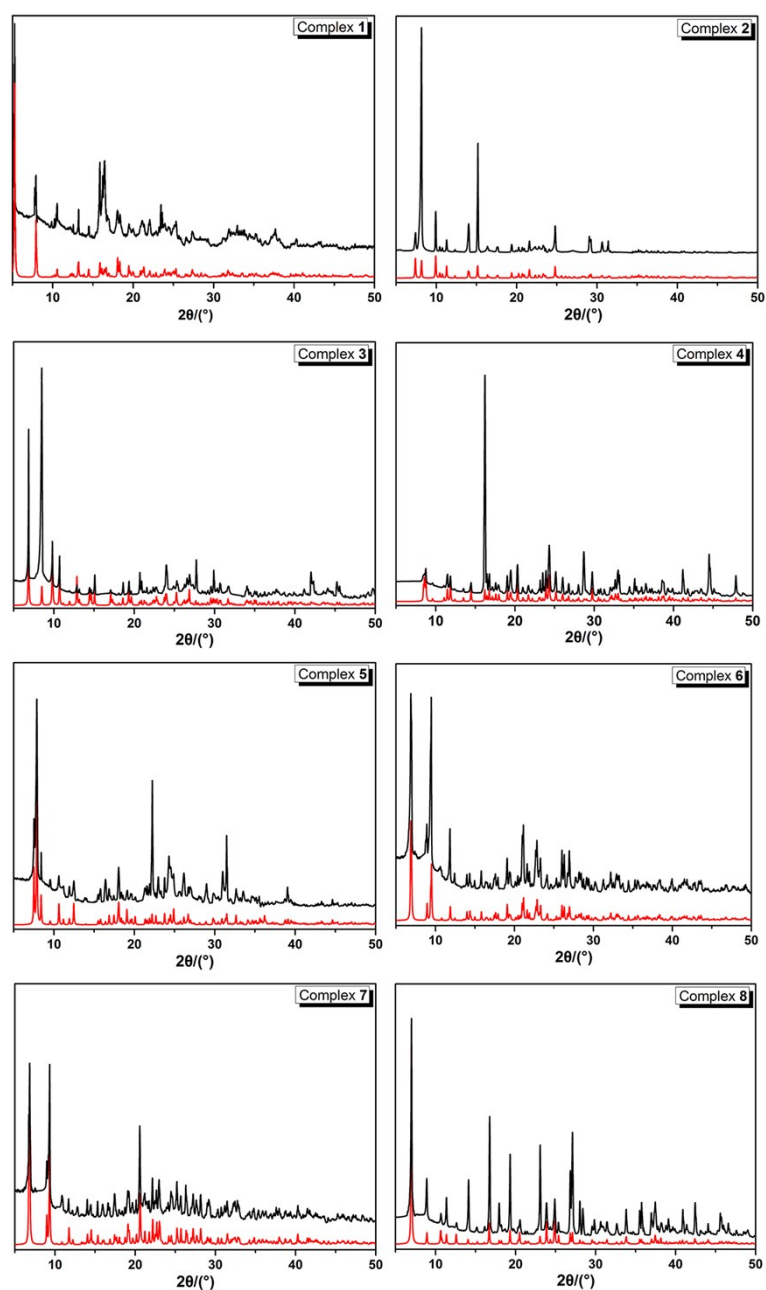

**Fig. S 11** Experimental (black) and simulated (red) PXRD patterns of 1–8.

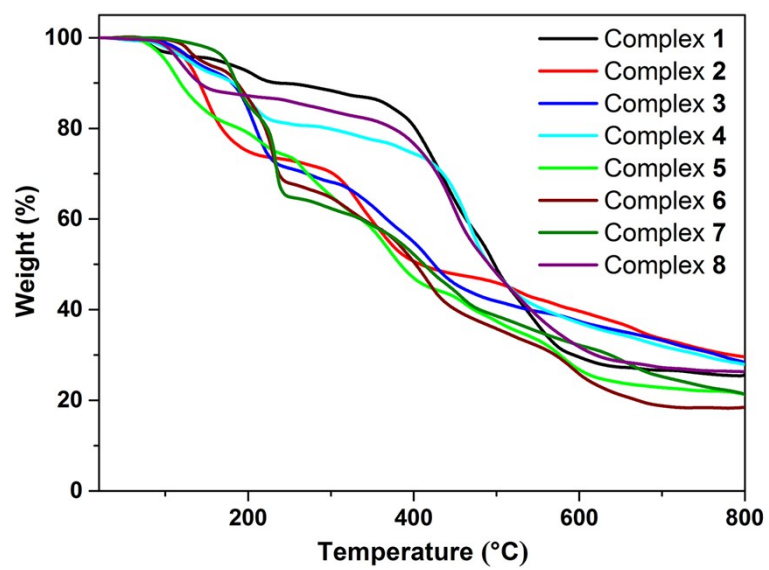

**Fig. S12** TGA curves of 1–8.
